# Supplementary material for: Phase I clinical study of RG7356, an anti-CD44 humanized antibody, in patients with acute myeloid leukemia
Source: PubMed Central journal article supplement (PMC5078031; doi:10.18632/oncotarget.8687), 2016-04-11
Supplement: oncotarget-07-32532-s001.pdf [file oncotarget-07-32532-s001.pdf]

## Phase I clinical study of RG7356, an anti-CD44 humanized antibody, in patients with acute myeloid leukemia

### SUPPLEMENTARY MATERIALS AND METHODS

#### Key inclusion/exclusion criteria

Eligible patients were aged  $> 18$  years and  $\leq 60$  years old in second relapse and beyond or refractory in first relapse (i.e. failure of at least 1 cytarabine-containing regimen) or primary refractory after at least 2 induction courses;  $> 60$  years old in relapse and/or failure of at least 1 cytarabine-containing induction regimen;  $> 70$  years old previously untreated and not eligible for conventional induction chemotherapy; relapse following hematopoietic stem cell transplantation; Eastern Cooperative Oncology Group performance status of 0–2; white blood cell count  $< 30 \times 10^9/L$ ; adequate hepatic function (bilirubin  $\leq 2$  mg/dL, aspartate aminotransferase (AST)/alanine transaminase (ALT)  $\leq 2.5 \times$  upper limit of normal or renal function [normal serum creatinine]); and no prior therapy for  $\geq 14$  days with the exception of hydroxyurea; increased QTc interval (QTc  $> 470$  ms).

#### Dose-limiting toxicity (DLT) definition

DLT was defined as: (1) any nonhematologic toxicity grade  $\geq 3$  attributable to RG7356 except for

fatigue, anorexia, and alopecia; (2) grade 3 aspartate AST or ALT toxicity lasting for  $> 7$  days; or (3) prolonged myelosuppression (i.e. marrow hypocellularity without evidence of leukemia [ $< 5\%$  blasts] on day 42 or later from start of therapy).

#### Treatment

RG7356 was supplied in 2 pharmaceutical forms as 200-mg vials (Ro 542-9083/F04, cohorts 1–6) or 250-mg vials (Ro 542-9083/F05, cohort 7) by the sponsor (F. Hoffmann-La Roche Ltd, Basel, Switzerland). Initially, the first infusion was administered over 3 hours. From 2400 mg q2w cohort onward, the first infusion started at a rate of 10 mg/h for the first hour to reduce the severity of IRRs. Thereafter, the infusion rate was escalated in 30-minute intervals up to a maximum infusion rate of 800 mg/h. If the first infusion was well tolerated, subsequent infusions started at a rate of 20 mg/h for 15 minutes and were escalated in 15-minute intervals up to an infusion rate of 800 mg/h.

## RESULTS

Supplemental Table 1: PK for RG7356

| Regimen (dose schedule) | Statistic | $t_{1/2}$ (h) | $t_{max}^a$ (h) | $C_{max}$ ( $\mu\text{g/mL}$ ) | AUC ( $\text{h}^* \mu\text{g/mL}$ ) | $V_d$ (mL) | Cl (mL/h) |
|-------------------------|-----------|---------------|-----------------|--------------------------------|-------------------------------------|------------|-----------|
| 300 mg q2w              | <i>n</i>  | 4             | 4               | 4                              | 4                                   | 4          | 4         |
|                         | Mean      | 63.0          | 3.29            | 20.6                           | 750                                 | 44600      | 523       |
|                         | SD        | 24.4          | 0.649           | 6.17                           | 448                                 | 21200      | 338       |
|                         | CV%       | 38.7          | 18.5            | 30.0                           | 59.8                                | 47.6       | 64.6      |
| 600 mg q2w              | <i>n</i>  | 5             | 5               | 5                              | 5                                   | 5          | 5         |
|                         | Mean      | 43.8          | 5.00            | 62.9                           | 3450                                | 11600      | 195       |
|                         | SD        | 12.2          | 2.68            | 16.9                           | 1400                                | 3130       | 82.8      |
|                         | CV%       | 27.8          | 48.0            | 26.9                           | 40.5                                | 27.1       | 42.4      |
| 1200 mg q2w             | <i>n</i>  | 5             | 5               | 5                              | 5                                   | 5          | 5         |
|                         | Mean      | 59.2          | 5.25            | 185                            | 12400                               | 8880       | 105       |
|                         | SD        | 5.79          | 1.96            | 39.1                           | 4150                                | 3050       | 36.5      |
|                         | CV%       | 9.8           | 35.0            | 21.1                           | 33.5                                | 34.3       | 34.8      |
| 2400 mg q2w             | <i>n</i>  | 5             | 5               | 5                              | 5                                   | 5          | 5         |
|                         | Mean      | 58.5          | 6.00            | 329                            | 21100                               | 12000      | 136       |
|                         | SD        | 11.0          | 0.729           | 101                            | 9450                                | 8650       | 72.7      |
|                         | CV%       | 18.8          | 11.1            | 30.8                           | 44.8                                | 72.0       | 53.3      |
| 1200 mg weekly          | <i>n</i>  | NC            | 9               | 9                              | 9                                   | NC         | NC        |
|                         | Mean      | NC            | 6.62            | 175                            | 9980                                | NC         | NC        |
|                         | SD        | NC            | 1.95            | 79.2                           | 4490                                | NC         | NC        |
|                         | CV%       | NC            | 30.4            | 45.1                           | 45.0                                | NC         | NC        |

Abbreviations: AUC, area under the curve;  $C_{max}$ , peak concentration; Cl, clearance; CV, coefficient of variation; NC, not collected; PK, pharmacokinetics; SD, standard deviation;  $t_{1/2}$ , half-life;  $t_{max}$ , time to peak concentration.

<sup>a</sup>Median.
